# Supplementary material for: A Systematic Review of Medication Exposure Assessment in Prospective Cohort Studies of Community Dwelling Older Australians
Source: PubMed Central journal article supplement (PMC4409061; doi:10.1371/journal.pone.0124247), 2015-04-24
Supplement: pone.0124247.s002.pdf [file pone.0124247.s002.pdf]

**Table S1: Medication-related publications arising from included cohort studies**

| Cohort study | Medication-focussed publications                                                |           |                                                                 |           |                                                |           |                            |           | CAM*-focussed publications  |           |
|--------------|---------------------------------------------------------------------------------|-----------|-----------------------------------------------------------------|-----------|------------------------------------------------|-----------|----------------------------|-----------|-----------------------------|-----------|
|              | Cross-sectional (prevalence of factors associated with baseline medication use) |           | Prevalence of baseline medication use and incidence of outcomes |           | Prevalence of medication use at multiple waves |           | Other                      |           |                             |           |
|              | Number of publications (27)                                                     | Reference | Number of publications (19)                                     | Reference | Number of publications (17)                    | Reference | Number of publications (2) | Reference | Number of publications (22) | Reference |
| 45 & Up [1]  | 2                                                                               | [2,3]     | 0                                                               |           | 2                                              | [4,5]     | 1                          | [6]       | 3                           | [7-9]     |
| AIBL [10]    | 1                                                                               | [11]      | 0                                                               |           | 0                                              |           | 0                          |           | 0                           |           |
| ALSA [12]    | 0                                                                               |           | 1                                                               | [13]      | 2                                              | [14,15]   | 1                          | [16]      | 1                           | [17]      |
| ALSWH [18]   | 4                                                                               | [19-22]   | 0                                                               |           | 5                                              | [23-27]   | 0                          |           | 16#                         | [28-43]   |
| AusDiab [44] | 3                                                                               | [45-47]   | 0                                                               |           | 0                                              |           | 0                          |           | 0                           |           |
| BMES [48]    | 8                                                                               | [49-56]   | 9                                                               | [57-65]   | 4                                              | [66-69]   | 0                          |           | 2                           | [70,71]   |
| CLS [72]     | 0                                                                               |           | 0                                                               |           | 1                                              | [73]      | 0                          |           | 0                           |           |
| CHAMP [74]   | 6                                                                               | [75-80]   | 4                                                               | [81-84]   | 0                                              |           | 0                          |           | 0                           |           |
| HIMS [85]    | 1                                                                               | [86]      | 1                                                               | [87]      | 0                                              |           | 0                          |           | 1#                          | [29]      |
| HCS [88]     | 1                                                                               | [89]      | 0                                                               |           | 0                                              |           | 0                          |           | 0                           |           |
| MELSHA [90]  | 1                                                                               | [91]      | 2                                                               | [92,93]   | 0                                              |           | 0                          |           | 0                           |           |
| SADLS [94]   | 0                                                                               |           | 0                                                               |           | 3                                              | [95-97]   | 0                          |           | 0                           |           |
| Syd-MAS [98] | 0                                                                               |           | 2                                                               | [99,100]  | 0                                              |           | 0                          |           |                             |           |

\* CAM: Complementary and alternative medicines

# 1 publication [29] includes data arising from ALSWH [18] and HIMS [85]

## References

1. 45 and Up Study Collaborators, Banks E, Redman S, Jorm L, Armstrong B, et al. (2008) Cohort profile: the 45 and up study. *Int J Epidemiol* 37: 941-947.
2. Kemp A, Preen DB, Saunders C, Boyle F, Bulsara M, et al. (2014) Women commencing anastrozole, letrozole or tamoxifen for early breast cancer: the impact of comorbidity and demographics on initial choice. *PLoS One* 9(1): e84835. doi:10.1371/journal.pone.0084835.
3. Chiu CL, Lujic S, Thornton C, O'Loughlin A, Makris A, et al. (2012) Menopausal hormone therapy is associated with having high blood pressure in postmenopausal women: observational cohort study. *PLoS One* 7(7): e40260. doi:10.1371/journal.pone.0040260.
4. Rogers KD, Kemp A, McLachlan AJ, Blyth F (2013) Adverse Selection? A Multi-Dimensional Profile of People Dispensed Opioid Analgesics for Persistent Non-Cancer Pain. *PLoS ONE* 8(12): e80095. doi:10.1371/journal.pone.0080095.
5. Warren JR, Falster MO, Fox D, Jorm L (2013) Factors influencing adherence in long-term use of statins. *Pharmacoepidemiol Drug Saf* 22: 1298-1307.

6. Gnjidic D, Le Couteur DG, Pearson SA, McLachlan AJ, Viney R, et al. (2013) High risk prescribing in older adults: prevalence, clinical and economic implications and potential for intervention at the population level. *BMC Public Health* 13: 115.
7. Adams J, Sibbritt D, Lui C-W, Broom A, Wardle J (2013)  $\Omega$ -3 fatty acid supplement use in the 45 and Up Study Cohort. *BMJ Open* 3: e002292. doi:10.1136/bmjopen-2012-002292.
8. Rahman SZ, Basilakis J, Rahmadi A, Lujic S, Musgrave I, et al. (2013) Use of serotonergic antidepressants and St John's wort in older Australians: a population-based cohort study. *Australas Psychiatry* 21: 262-266.
9. Sibbritt D, Adams J, Lui CW, Broom A, Wardle J (2012) Who uses glucosamine and why? A study of 266,848 Australians aged 45 years and older. *PLoS One* 7(7): e41540. doi:10.1371/journal.pone.0041540.
10. Ellis KA, Bush AI, Darby D, De Fazio D, Foster J, et al. (2009) The Australian Imaging, Biomarkers and Lifestyle (AIBL) study of aging: methodology and baseline characteristics of 1112 individuals recruited for a longitudinal study of Alzheimer's disease. *Int Psychogeriatr* 21: 672-687.
11. Sittironnarit G, Ames D, Bush AI, Faux N, Flicker L, et al. (2011) Effects of anticholinergic drugs on cognitive function in older Australians: results from the AIBL study. *Dement Geriatr Cogn Disord* 31: 173-178.
12. Andrews G, Clark M, Luszcz M (2002) Successful Aging in the Australian Longitudinal Study of Aging: Applying the MacArthur Model Cross-Nationally. *J Soc Issues* 58: 749-765.

13. Vitry A, Wong SA, Roughead EE, Ramsay E, Barratt J (2009) Validity of medication-based co-morbidity indices in the Australian elderly population. *Aust N Z J Public Health* 33: 126-130.
14. Vitry AI, Hoile AP, Gilbert AL, Esterman A, Luszcz MA (2010) The risk of falls and fractures associated with persistent use of psychotropic medications in elderly people. *Arch Gerontol Geriatr* 50: e1-4.
15. Zhang Y, Chow V, Vitry AI, Ryan P, Roughead EE, et al. (2010) Antidepressant use and depressive symptomatology among older people from the Australian Longitudinal Study of Ageing. *Int Psychogeriatr* 22: 437-444.
16. Thomson WM (1997) A medication capture and analysis system for use in epidemiology. *Drugs Aging* 10: 290-298.
17. Goh LY, Vitry AI, Semple SJ, Esterman A, Luszcz MA (2009) Self-medication with over-the-counter drugs and complementary medications in South Australia's elderly population. *BMC Complement Altern Med* 9: 42.
18. Lee C, Dobson AJ, Brown WJ, Bryson L, Byles J, et al. (2005) Cohort Profile: the Australian Longitudinal Study on Women's Health. *Int J Epidemiol* 34: 987-991.
19. Hasan S, Byles JE, Mishra G, Harris MA (2001) Use of Sleeping Medication and Quality of Life among Older Women who Report Sleeping Difficulty. *Australas J Ageing* 20: 29-35.
20. Lowe J, Young AF, Dolja-Gore X, Byles J (2008) Cost of medications for older women. *Aust N Z J Public Health* 32: 89.

21. Tooth LR, Hockey R, Treloar S, McClintock C, Dobson A (2012) Does government subsidy for costs of medical and pharmaceutical services result in higher service utilization by older widowed women in Australia? *BMC Health Serv Res* 12: 179.
22. Dolja-Gore X, Pit SW, Parkinson L, Young A, Byles J (2013) Accuracy of self-reported medicines use compared to pharmaceutical claims data amongst a national sample of older Australian women. *Open J Epidemiol* 3: 25-32.
23. Duke JM, Sibbritt DW, Young AF (2007) Is there an association between the use of oral contraception and depressive symptoms in young Australian women? *Contraception* 75: 27-31.
24. Stewart Williams JA, Wallick CJ, Byles JE, Doran CM (2013) Assessing patterns of use of cardio-protective polypill component medicines in Australian women. *Drugs Aging* 30: 193-203.
25. Lucke JC, Herbert D, Watson M, Dobson A (2011) Contraceptive Changes after Reproductive Events among Australian Women Born in 1973 to 1978: A Longitudinal Study from 1996 to 2009. *Womens Health Issues* 21: 438-443.
26. Lucke JC, Watson M, Herbert D (2009) Changing patterns of contraceptive use in Australian women. *Contraception* 80: 533-539.
27. Berecki-Gisolf J, Hockey R, Dobson A (2008) Adherence to bisphosphonate treatment by elderly women. *Menopause* 15: 984-990.
28. Adams J, Sibbritt D, Lui CW (2011) The use of complementary and alternative medicine during pregnancy: a longitudinal study of Australian women. *Birth* 38: 200-206.

29. McLaughlin D, Adams J, Sibbritt D, Lui C-W (2012) Sex differences in the use of complementary and alternative medicine in older men and women. *Australas J Ageing* 31: 78-82.
30. Meurk C, Broom A, Adams J, Sibbritt D (2013) Rurality, mobility, identity: Women's use of complementary and alternative medicine in rural Australia. *Health Place* 20: 75-80.
31. Murthy V, Sibbritt D, Adams J, Broom A, Kirby E, et al. (2014) Self-prescribed complementary and alternative medicine use for back pain amongst a range of care options: Results from a nationally representative sample of 1310 women aged 60–65 years. *Complement Ther Med* 22: 133-140.
32. Adams J, Sibbritt D, Lui CW (2011) The urban-rural divide in complementary and alternative medicine use: a longitudinal study of 10,638 women. *BMC Complement Altern Med* 11: 2.
33. Sibbritt D, Adams J, Murthy V (2013) The prevalence and determinants of Chinese medicine use by Australian women: analysis of a cohort of 10,287 women aged 56-61 years. *Am J Chin Med* 41: 281-291.
34. Sibbritt D, Adams J, Easthope G, Young A (2003) Complementary and alternative medicine (CAM) use among elderly Australian women who have cancer. *Supp Care Cancer* 11: 548-550.
35. Adams J, Sibbritt D, Broom A, Loxton D, Pirotta M, et al. (2011) A comparison of complementary and alternative medicine users and use across geographical areas: a national survey of 1,427 women. *BMC Complement Altern Med* 11: 85.

36. Sibbritt DW, Adams J, Young AF (2004) A longitudinal analysis of mid-age women's use of complementary and alternative medicine (CAM) in Australia, 1996-1998. *Women Health* 40: 41-56.
37. Steel A, Adams J, Sibbritt D, Broom A, Frawley J, et al. (2013) The Influence of Complementary and Alternative Medicine Use in Pregnancy on Labor Pain Management Choices: Results from a Nationally Representative Sample of 1,835 Women. *J Altern Complement Med* 20: 87-97.
38. Poulsen EE, Sibbritt D, McLaughlin D, Adams J, Pachana NA (2013) Predictors of Complementary and Alternative Medicine (CAM) use in two cohorts of Australian women. *Int Psychogeriatr* 25: 168-170.
39. Sibbritt DW, Adams J (2010) Back pain amongst 8,910 young Australian women: a longitudinal analysis of the use of conventional providers, complementary and alternative medicine (CAM) practitioners and self-prescribed CAM. *Clin Rheumatol* 29: 25-32.
40. Sibbritt D, Adams J, Lui CW (2011) A longitudinal analysis of complementary and alternative medicine use by a representative cohort of young Australian women with asthma, 1996-2006. *J Asthma* 48: 380-386.
41. Adams J, Sibbritt D, Broom A, Loxton D, Wardle J, et al. (2013) Complementary and alternative medicine consultations in urban and nonurban areas: a national survey of 1427 Australian women. *J Manipulative Physiol Ther* 36: 12-19.
42. Beatty LJ, Adams J, Sibbritt D, Wade TD (2012) Evaluating the impact of cancer on complementary and alternative medicine use, distress and health related QoL among Australian women: A prospective longitudinal investigation. *Complement Ther Med* 20: 61-69.

43. Broom AF, Kirby ER, Sibbritt DW, Adams J, Refshauge KM (2012) Use of complementary and alternative medicine by mid-age women with back pain: a national cross-sectional survey. *BMC Complement Altern Med* 12: 98.
44. Dunstan DW, Zimmet PZ, Welborn TA, Cameron AJ, Shaw J, et al. (2002) The Australian Diabetes, Obesity and Lifestyle Study (AusDiab)-- methods and response rates. *Diabetes Res Clin Pract* 57: 119-129.
45. Briganti EM, Kerr PG, Shaw JE, Zimmet PZ, Atkins RC (2005) Prevalence and treatment of cardiovascular disease and traditional risk factors in Australian adults with renal insufficiency. *Nephrology (Carlton)* 10: 40-47.
46. Briganti EM, Shaw JE, Chadban SJ, Zimmet PZ, Welborn TA, et al. (2003) Untreated hypertension among Australian adults: the 1999-2000 Australian Diabetes, Obesity and Lifestyle Study (AusDiab). *Med J Aust* 179: 135-139.
47. Chen L, Rogers SL, Colagiuri S, Cadilhac DA, Mathew TH, et al. (2008) How do the Australian guidelines for lipid-lowering drugs perform in practice? Cardiovascular disease risk in the AusDiab Study, 1999-2000. *Med J Aust* 189: 319-322.
48. Panchapakesan J, Mitchell P, Tumuluri K, Rochtchina E, Foran S, et al. (2003) Five year incidence of cataract surgery: the Blue Mountains Eye Study. *Br J Ophthalmol* 87: 168-172.
49. Cumming RG, Mitchell P (1997) Hormone replacement therapy, reproductive factors, and cataract. The Blue Mountains Eye Study. *Am J Epidemiol* 145: 242-249.
50. Cumming RG, Mitchell P (1998) Medications and cataract. The Blue Mountains Eye Study. *Ophthalmology* 105: 1751-1758.



51. Cumming RG, Mitchell P, Leeder SR (1997) Use of inhaled corticosteroids and the risk of cataracts. *N Engl J Med* 337: 8-14.
52. Hourihan F, Mitchell P (1999) Factors associated with use of glaucoma medications in a population of older people: The Blue Mountains Eye Study. *Aust N Z J Ophthalmol* 27: 176-179.
53. Leung H, Wang JJ, Rochtchina E, Wong TY, Klein R, et al. (2004) Does hormone replacement therapy influence retinal microvascular caliber? *Microvasc Res* 67: 48-54.
54. Mitchell P, Wang JJ, Cumming RG, House P, England JD (2000) Long-term topical timolol and blood lipids: the Blue Mountains Eye Study. *J Glaucoma* 9: 174-178.
55. Smith W, Mitchell P, Wang JJ (1997) Gender, oestrogen, hormone replacement and age-related macular degeneration: results from the Blue Mountains Eye Study. *Aust N Z J Ophthalmol* 25 Suppl 1: S13-15.
56. Wu KH, Wang JJ, Rochtchina E, Foran S, Ng MK, et al. (2004) Angiotensin-converting enzyme inhibitors (ACEIs) and age-related maculopathy (ARM): cross-sectional findings from the Blue Mountains Eye Study. *Acta Ophthalmol Scand* 82: 298-303.
57. Gopinath B, Flood VM, Teber E, McMahon CM, Mitchell P (2011) Dietary Intake of Cholesterol Is Positively Associated and Use of Cholesterol-Lowering Medication Is Negatively Associated with Prevalent Age-Related Hearing Loss. *J Nutr* 141: 1355-1361.
58. Kanthan GL, Wang JJ, Rochtchina E, Mitchell P (2009) Use of antihypertensive medications and topical beta-blockers and the long-term incidence of cataract and cataract surgery. *Br J Ophthalmol* 93: 1210-1214.

59. Kanthan GL, Wang JJ, Burlutsky G, Rochtchina E, Cumming RG, et al. (2010) Exogenous oestrogen exposure, female reproductive factors and the long-term incidence of cataract: the Blue Mountains Eye Study. *Acta Ophthalmologica* 88: 773-778.
60. Liew G, Mitchell P, Leeder SR, Smith W, Wong TY, et al. (2006) Regular aspirin use and retinal microvascular signs: the Blue Mountains Eye Study. *J Hypertens* 24: 1329-1335.
61. Liew G, Mitchell P, Wong TY, Rochtchina E, Wang JJ (2013) The association of aspirin use with age-related macular degeneration. *JAMA Intern Med* 173: 258-264.
62. van Leeuwen R, Tomany SC, Wang JJ, Klein R, Mitchell P, et al. (2004) Is medication use associated with the incidence of early age-related maculopathy? Pooled findings from 3 continents. *Ophthalmology* 111: 1169-1175.
63. Wang JJ, Mitchell P, Smith W, Gillies M, Billson F, et al. (2003) Systemic use of anti-inflammatory medications and age-related maculopathy: the Blue Mountains Eye Study. *Ophthalmic Epidemiol* 10: 37-48.
64. Wang JJ, Rochtchina E, Tan AG, Cumming RG, Leeder SR, et al. (2009) Use of inhaled and oral corticosteroids and the long-term risk of cataract. *Ophthalmology* 116: 652-657.
65. Younan C, Mitchell P, Cumming RG, Panchapakesan J, Rochtchina E, et al. (2002) Hormone replacement therapy, reproductive factors, and the incidence of cataract and cataract surgery: the Blue Mountains Eye Study. *Am J Epidemiol* 155: 997-1006.

66. Buyken AE, Flood V, Rochtchina E, Nestel P, Brand-Miller J, et al. (2010) Modifications in Dietary Fat Quality Are Associated with Changes in Serum Lipids of Older Adults Independently of Lipid Medication. *J Nutr* 140: 88-94.
67. Chandrasekaran S, Cumming RG, Rochtchina E, Mitchell P (2006) Associations between elevated intraocular pressure and glaucoma, use of glaucoma medications, and 5-year incident cataract: the Blue Mountains Eye Study. *Ophthalmology* 113: 417-424.
68. Tan JS, Mitchell P, Rochtchina E, Wang JJ (2007) Statin use and the long-term risk of incident cataract: the Blue Mountains Eye Study. *Am J Ophthalmol* 143: 687-689.
69. Tan JS, Mitchell P, Rochtchina E, Wang JJ (2007) Statins and the long-term risk of incident age-related macular degeneration: the Blue Mountains Eye Study. *Am J Ophthalmol* 143: 685-687.
70. Kuzniarz M, Mitchell P, Cumming RG, Flood VM (2001) Use of vitamin supplements and cataract: the Blue Mountains Eye Study. *Am J Ophthalmol* 132: 19-26.
71. Kuzniarz M, Mitchell P, Flood VM, Wang JJ (2002) Use of vitamin and zinc supplements and age-related maculopathy: the Blue Mountains Eye Study. *Ophthalmic Epidemiol* 9: 283-295.
72. Christensen H, Mackinnon A, Jorm AF, Korten A, Jacomb P, et al. (2004) The Canberra Longitudinal Study: Design, Aims, Methodology, Outcomes and Recent Empirical Investigations. *Aging Neuropsychol Cogn* 11: 169-195.

73. Henderson AS, Jorm AF, Christensen H, Jacomb PA, Korten AE (1997) Aspirin, anti-inflammatory drugs and risk of dementia. *Int J Geriatr Psychiatry* 12: 926-930.
74. Cumming RG, Handelsman D, Seibel MJ, Creasey H, Sambrook P, et al. (2009) Cohort Profile: the Concord Health and Ageing in Men Project (CHAMP). *Int J Epidemiol* 38: 374-378.
75. Bleicher K, Naganathan V, Cumming RG, Seibel MJ, Sambrook PN, et al. (2010) Prevalence and treatment of osteoporosis in older Australian men: findings from the CHAMP study. *Med J Aust* 193: 387-391.
76. Bleicher K, Cumming RG, Naganathan V, Seibel MJ, Sambrook PN, et al. (2011) Lifestyle factors, medications, and disease influence bone mineral density in older men: findings from the CHAMP study. *Osteoporos Int* 22: 2421-2437.
77. Gnjjidic D, Cumming RG, Le Couteur DG, Handelsman DJ, Naganathan V, et al. (2009) Drug Burden Index and physical function in older Australian men. *Br J Clin Pharmacol* 68: 97-105.
78. Gnjjidic D, Le Couteur DG, Hilmer SN, Cumming RG, Blyth FM, et al. (2014) Sedative load and functional outcomes in community-dwelling older Australian men: the CHAMP study. *Fundam Clin Pharmacol* 28: 10-19.
79. Gnjjidic D, Le Couteur DG, Naganathan V, Cumming RG, Creasey H, et al. (2012) Effects of drug burden index on cognitive function in older men. *J Clin Psychopharmacol* 32: 273-277.

80. Ilomaki J, Gnjidic D, Hilmer SN, Le Couteur DG, Naganathan V, et al. (2013) Psychotropic drug use and alcohol drinking in community-dwelling older Australian men: The CHAMP study. *Drug Alcohol Rev* 32: 218-222.
81. Gnjidic D, Hilmer SN, Blyth FM, Naganathan V, Cumming RG, et al. (2012) High-risk prescribing and incidence of frailty among older community-dwelling men. *Clin Pharmacol Ther* 91: 521-528.
82. Gnjidic D, Hilmer SN, Blyth FM, Naganathan V, Waite L, et al. (2012) Polypharmacy cutoff and outcomes: five or more medicines were used to identify community-dwelling older men at risk of different adverse outcomes. *J Clin Epidemiol* 65: 989-995.
83. Gnjidic D, Le Couteur DG, Blyth FM, Trivison T, Rogers K, et al. (2013) Statin use and clinical outcomes in older men: a prospective population-based study. *BMJ Open* 3: e002333. doi:10.1136/bmjopen-2012-002333
84. Gnjidic D, Stanaway FF, Cumming R, Waite L, Blyth F, et al. (2012) Mild cognitive impairment predicts institutionalization among older men: a population-based cohort study. *PLoS One* 7: e46061. doi:10.1371/journal.pone.0046061
85. Norman PE, Flicker L, Almeida OP, Hankey GJ, Hyde Z, et al. (2009) Cohort Profile: The Health In Men Study (HIMS). *Int J Epidemiol* 38: 48-52.
86. Almeida OP, Flicker L, Yeap BB, Alfonso H, McCaul K, et al. (2012) Aspirin decreases the risk of depression in older men with high plasma homocysteine. *Transl Psychiatry* 2: e151.

87. Beer C, Hyde Z, Almeida OP, Norman P, Hankey GJ, et al. (2011) Quality use of medicines and health outcomes among a cohort of community dwelling older men: an observational study. *Br J Clin Pharmacol* 71: 592-599.
88. McEvoy M, Smith W, D'Este C, Duke J, Peel R, et al. (2010) Cohort profile: The Hunter Community Study. *Int J Epidemiol* 39: 1452-1463.
89. McGettigan P, Lincz LF, Attia J, McElduff P, Bissett L, et al. (2011) The risk of coronary thrombosis with cyclo-oxygenase-2 inhibitors does not vary with polymorphisms in two regions of the cyclo-oxygenase-2 gene. *Br J Clin Pharmacol* 72: 707-714.
90. Browning CJ, Kendig H (2010) Cohort profile: the Melbourne Longitudinal Studies on Healthy Ageing Program. *Int J Epidemiol* 39: e1-7.
91. Thomson JA, Wang WC, Browning C, Kendig HL (2010) Self-reported medication side effects in an older cohort living independently in the community--the Melbourne Longitudinal Study on Healthy Ageing (MELSHA): cross-sectional analysis of prevalence and risk factors. *BMC Geriatr* 10: 37.
92. Atlantis E, Browning C, Sims J, Kendig H (2010) Diabetes incidence associated with depression and antidepressants in the Melbourne Longitudinal Studies on Healthy Ageing (MELSHA). *Int J Ger Psychiatry* 25: 688-696.
93. Atlantis E, Grayson DA, Browning C, Sims J, Kendig H (2011) Cardiovascular disease and death associated with depression and antidepressants in the Melbourne Longitudinal Studies on Healthy Ageing (MELSHA). *Int J Ger Psychiatry* 26: 341-350.
94. Slade GD, Gansky SA, Spencer AJ (1997) Two-year incidence of tooth loss among South Australians aged 60+ years. *Community Dent Oral Epidemiol* 25: 429-437.

95. Thomson WM, Chalmers JM, Spencer AJ, Slade GD (2000) Medication and dry mouth: findings from a cohort study of older people. *J Public Health Dent* 60: 12-20.
96. Thomson WM, Spencer AJ, Slade GD, Chalmers JM (2002) Is medication a risk factor for dental caries among older people? *Community Dent Oral Epidemiol* 30: 224-232.
97. Thomson WM, Chalmers JM, Spencer AJ, Slade GD, Carter KD (2006) A longitudinal study of medication exposure and xerostomia among older people. *Gerodontology* 23: 205-213.
98. Sachdev PS, Brodaty H, Reppermund S, Kochan NA, Trollor JN, et al. (2010) The Sydney Memory and Ageing Study (MAS): Methodology and baseline medical and neuropsychiatric characteristics of an elderly epidemiological non-demented cohort of Australians aged 70-90 years. *Int Psychogeriatr* 22: 1248-1264.
99. Haerer W, Delbaere K, Bartlett H, Lord SR, Rowland J (2012) Relationships between HMG-CoA reductase inhibitors (statin) use and strength, balance and falls in older people. *Intern Med J* 42: 1329-1334.
100. Wong AKW, Lord SR, Sturnieks DL, Delbaere K, Trollor JN, et al. (2013) Angiotensin System–Blocking Medications Are Associated with Fewer Falls over 12 Months in Community-Dwelling Older People. *J Am Geriatr Soc* 61: 776-781.
